# Supplementary material for: The Pandemic-Related Factors Associated with Emergency Department Visits in Portugal throughout Two Years of the Pandemic: A Retrospective Population-Based Study
Source: MDPI journal article supplement (doi:10.3390/ijerph20021207), 2023-01-10

## **Supplementary material**

## Contents

|                                                                                      |    |
|--------------------------------------------------------------------------------------|----|
| Figure S1: ED admissions in mainland Portugal .....                                  | 3  |
| Figure S2: ED admissions in the North .....                                          | 4  |
| Figure S3: ED admissions in LVT .....                                                | 5  |
| Figure S4: ED admissions in the centre .....                                         | 6  |
| Figure S5: ED admissions in Algarve .....                                            | 7  |
| Figure S6: ED admission in Alentejo .....                                            | 8  |
| Figure S7: Incidence rate of COVID-19 per 10k inhabitants in mainland Portugal ..... | 9  |
| Figure S8: Incidence rate of COVID-19 per 10k inhabitants in the North .....         | 10 |
| Figure S9: Incidence rate of COVID-19 per 10k inhabitants in the Centre .....        | 11 |
| Figure S10: Incidence rate of COVID-19 per 10k inhabitants in LVT .....              | 12 |
| Figure S11: Incidence rate of COVID-19 per 10k inhabitants in Algarve .....          | 13 |
| Figure S12: Incidence rate of COVID-19 per 10k inhabitants in Alentejo .....         | 14 |
| Figure S13: Vaccination coverage in mainland Portugal .....                          | 15 |
| Figure S14: Vaccination coverage in the North .....                                  | 16 |
| Figure S15: Vaccination coverage in the Centre .....                                 | 17 |
| Figure S16: Vaccination coverage in LVT .....                                        | 18 |
| Figure S17: Vaccination coverage in Algarve .....                                    | 19 |
| Figure S18: Vaccination coverage in Alentejo .....                                   | 20 |
| Figure S19: Containment index in Portugal .....                                      | 21 |
| Figure S20: Google search on the term coronavirus in Portugal .....                  | 22 |
| Figure S21: Mobility in Portugal .....                                               | 23 |

**Figure S1: ED admissions in mainland Portugal**

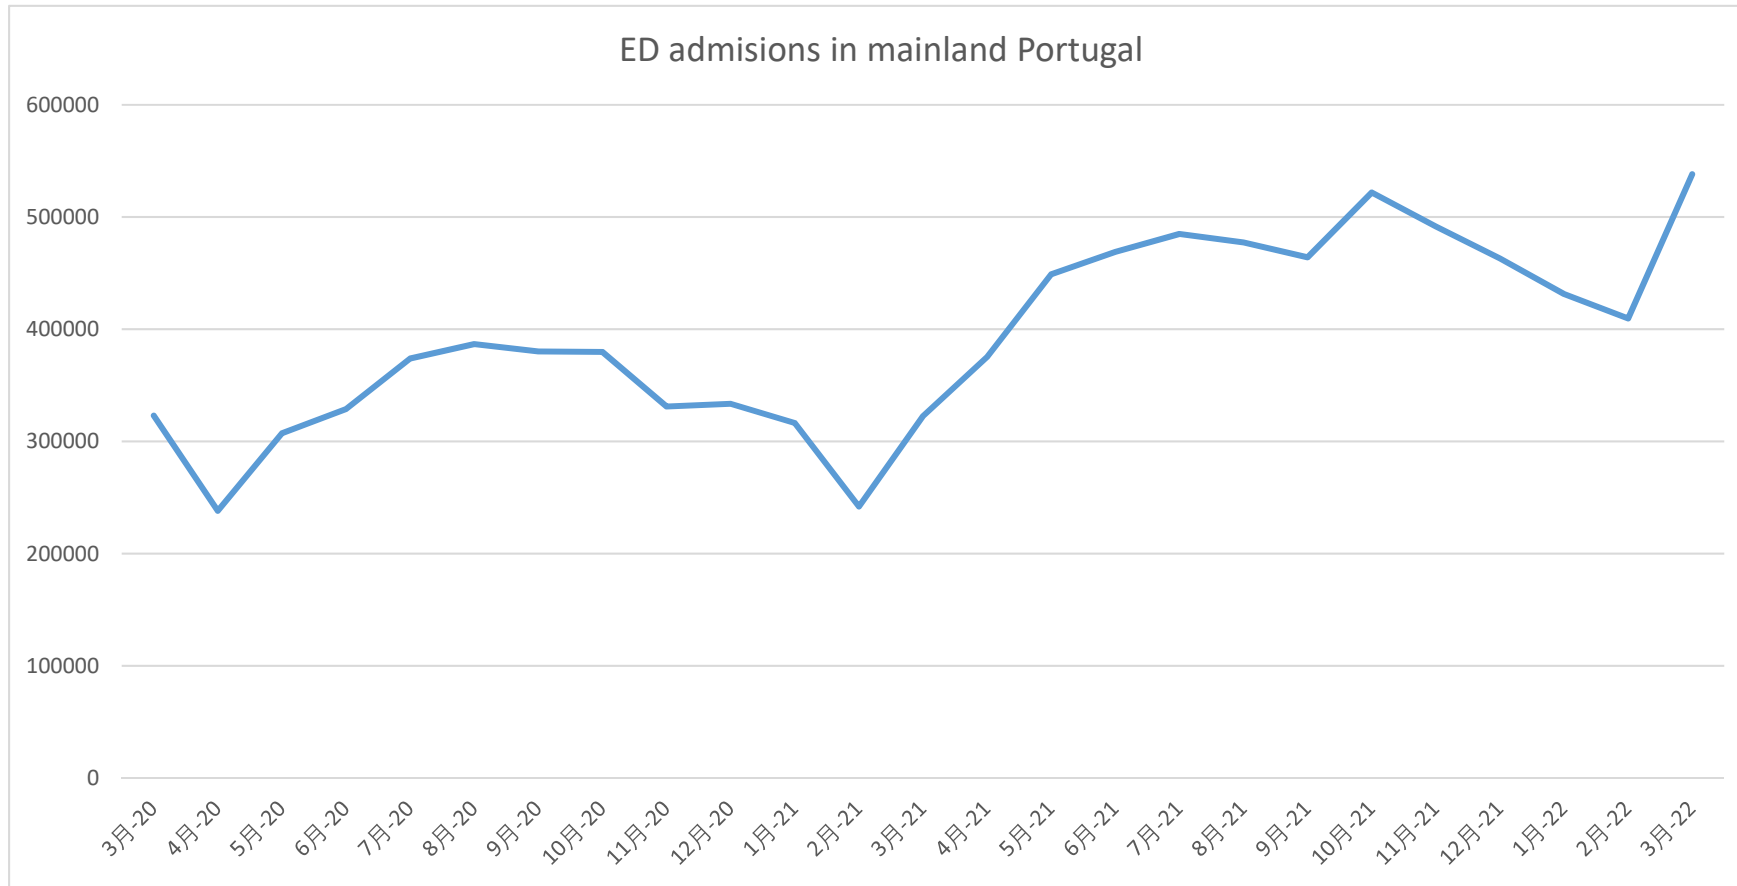

Figure S2: ED admissions in the North

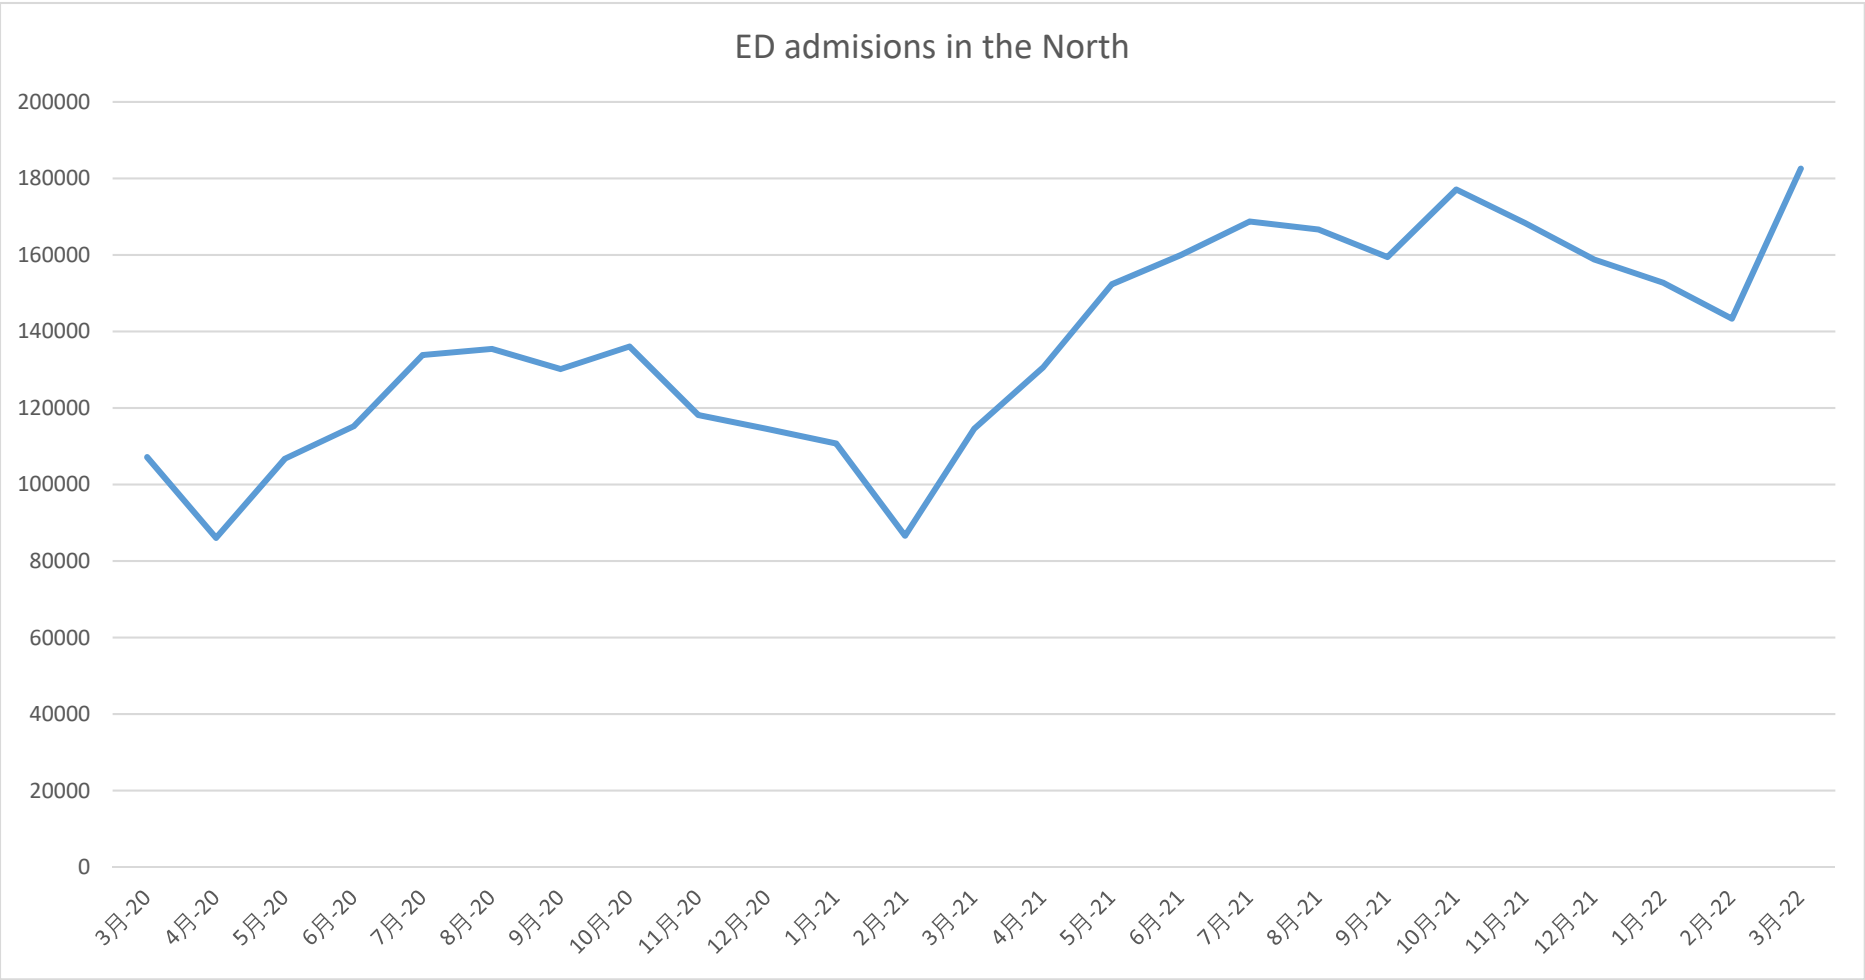

Figure S3: ED admissions in LVT

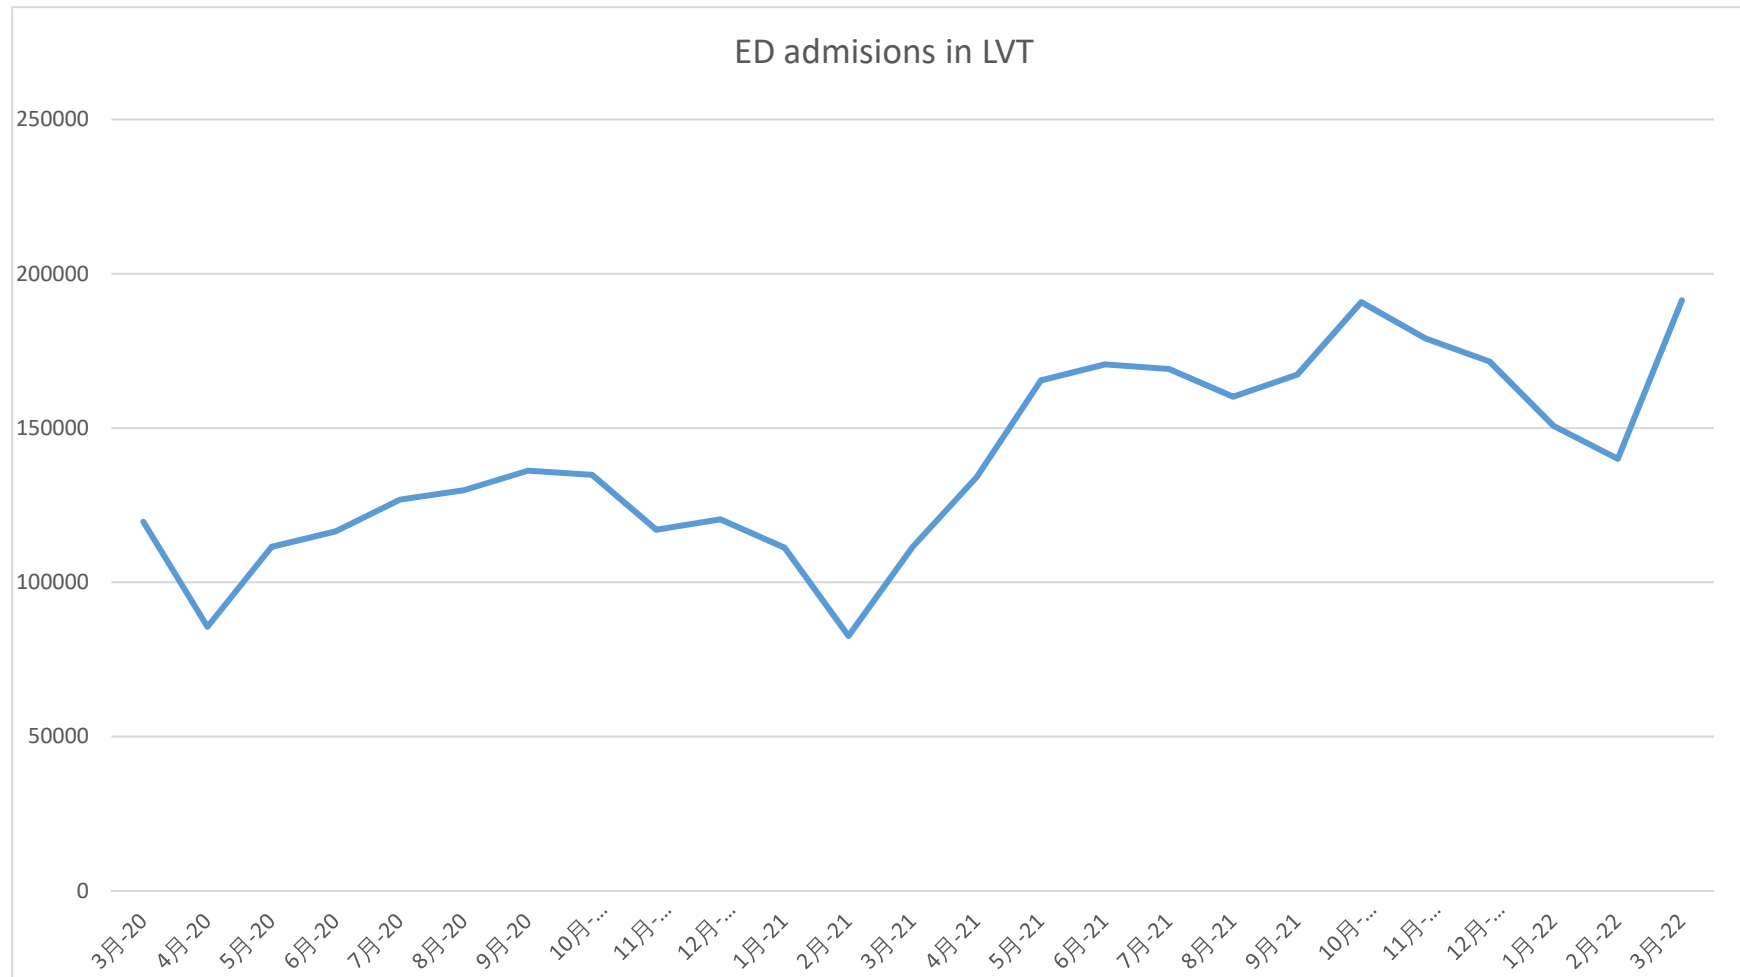

Figure S4: ED admissions in the centre

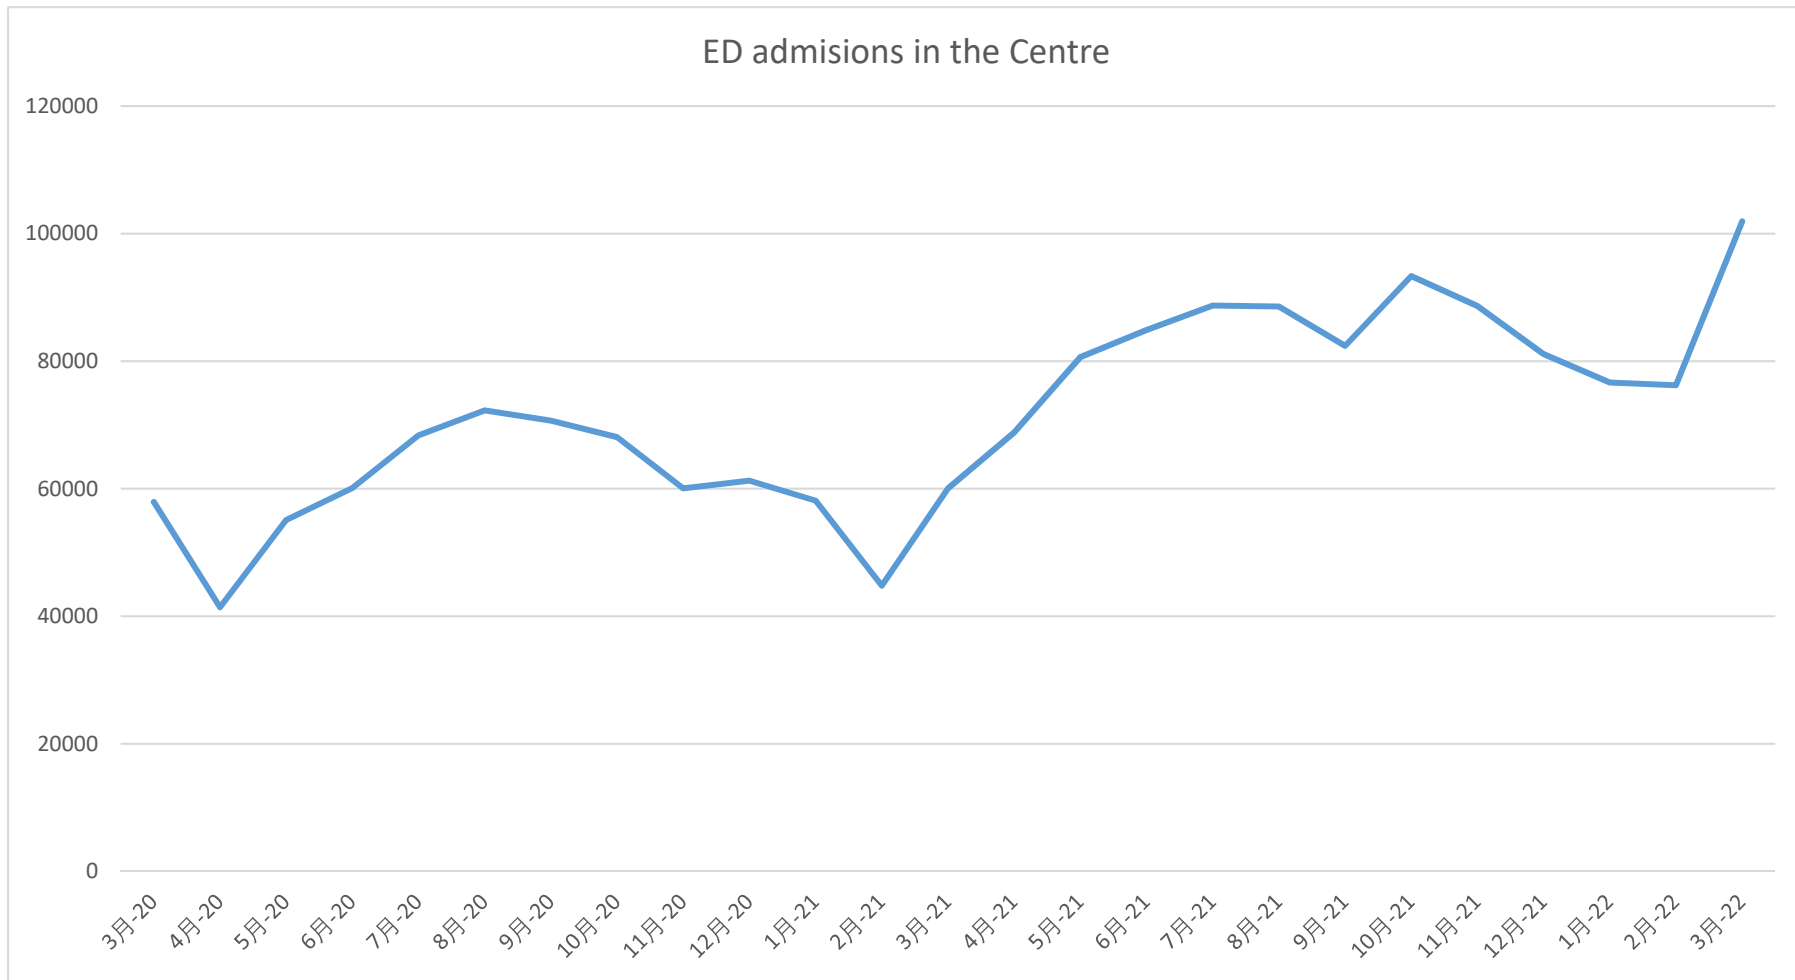

Figure S5: ED admissions in Algarve

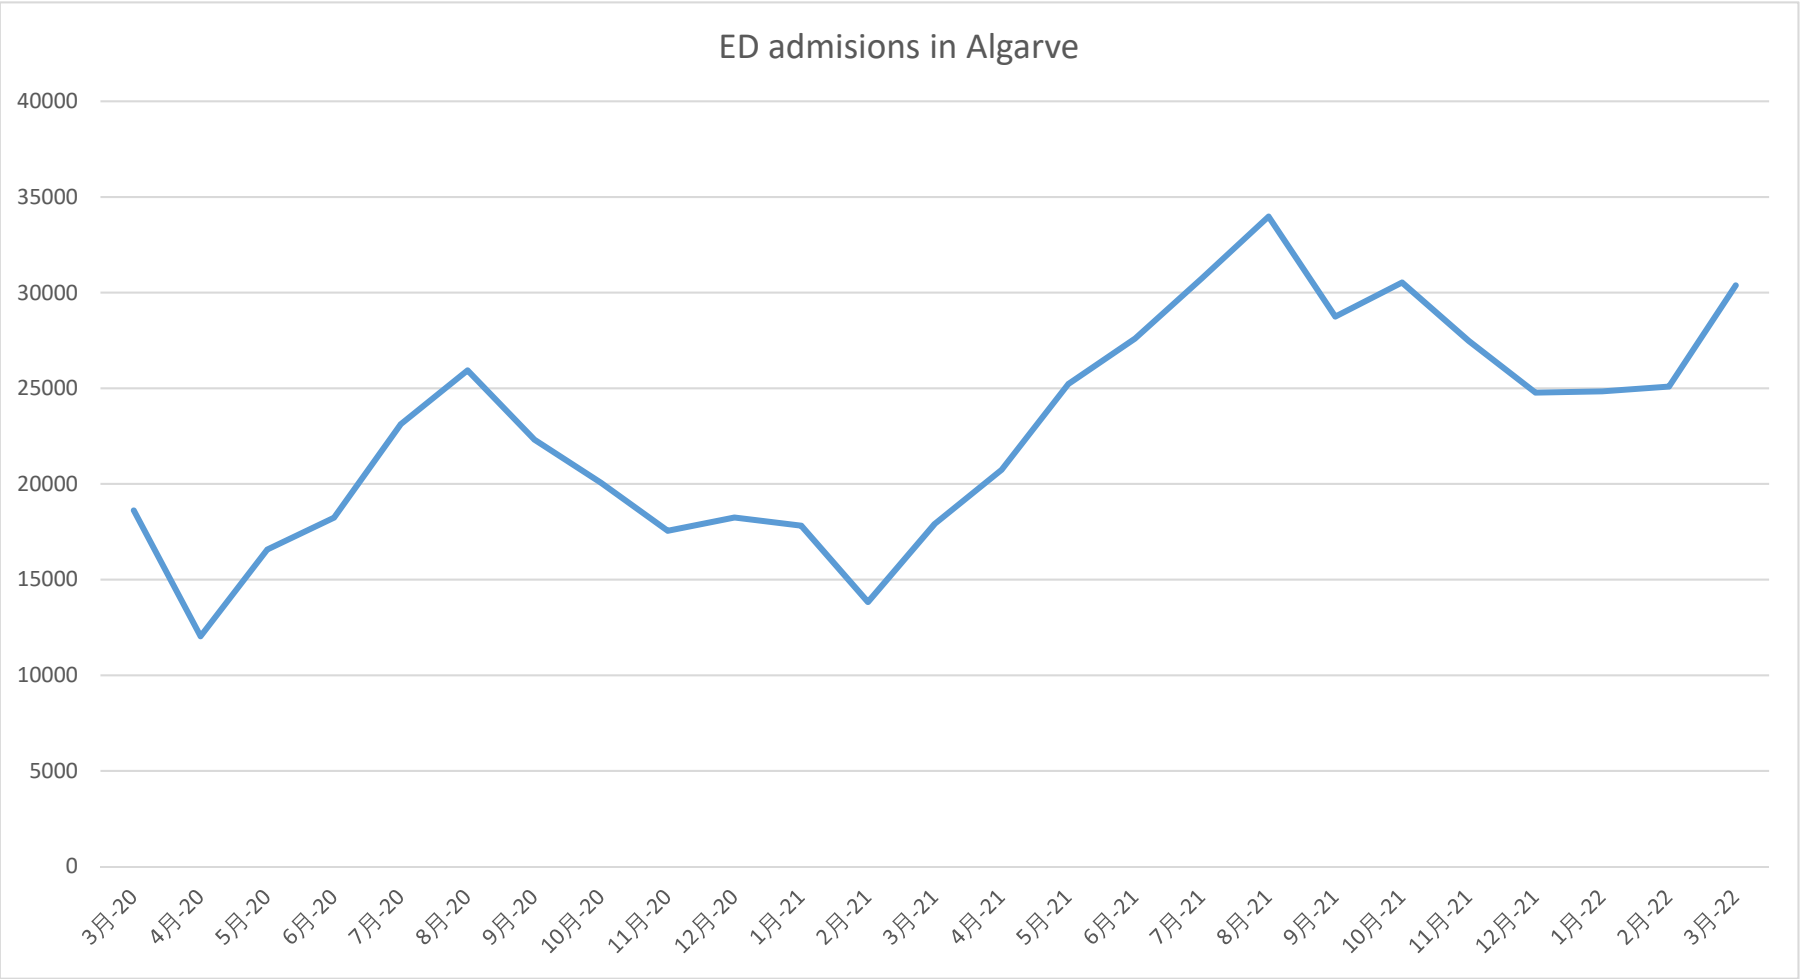

Figure S6. ED admission in Alentejo

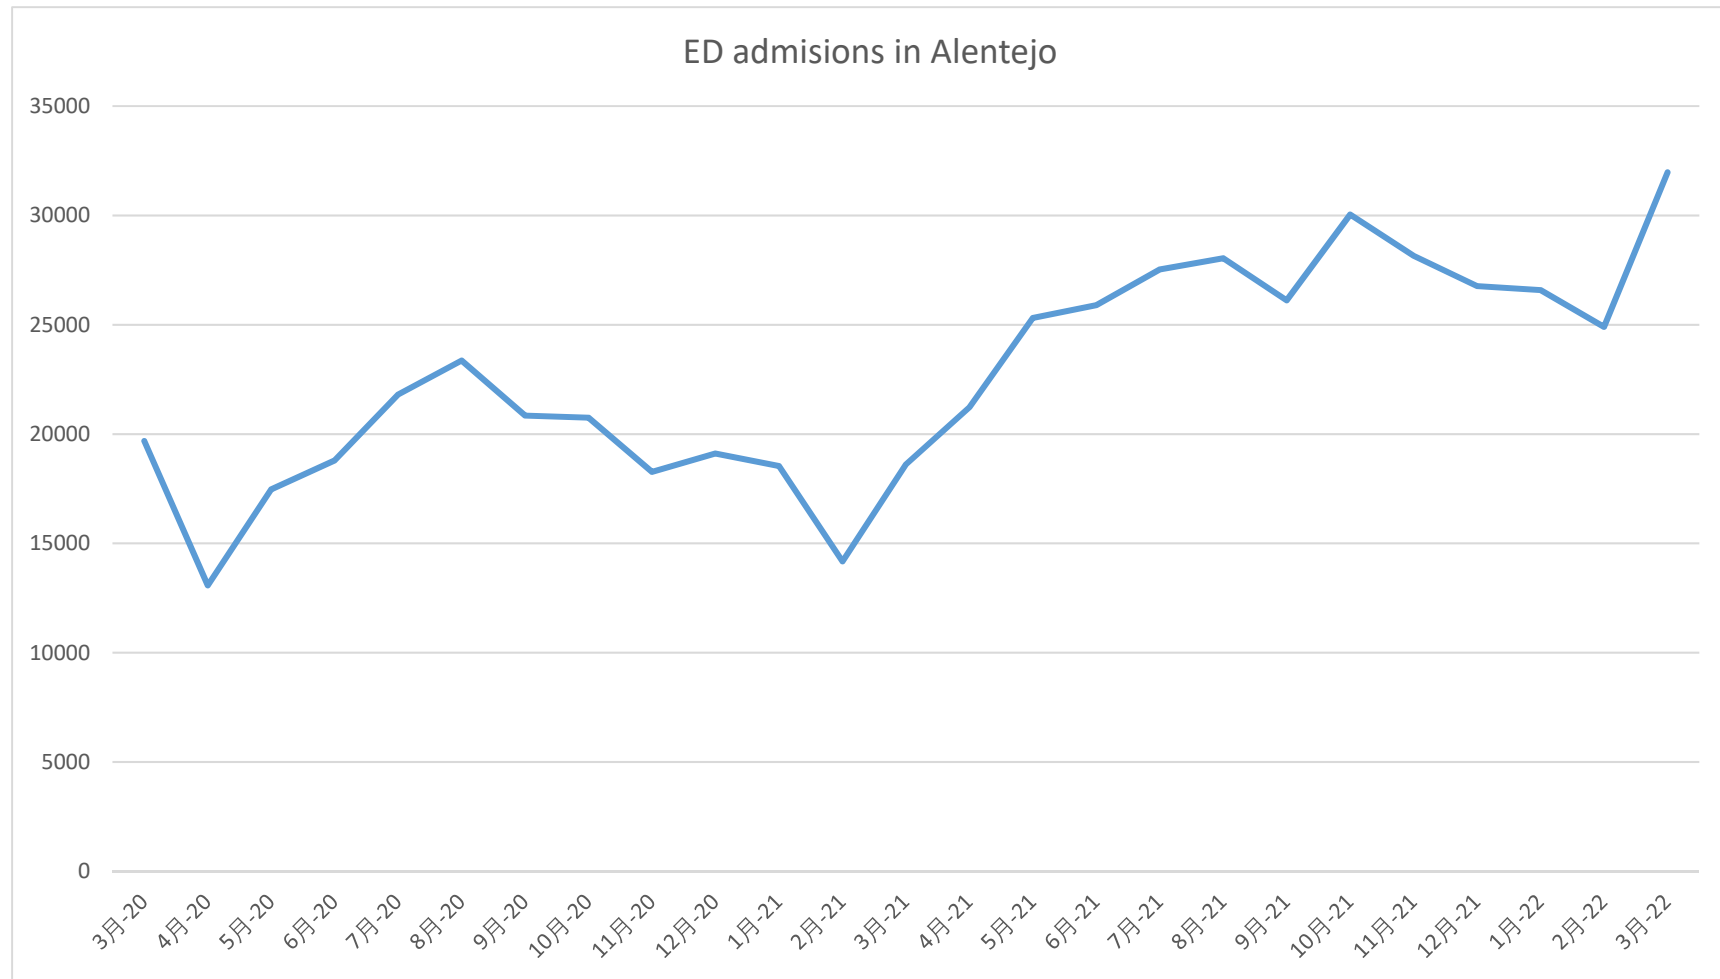



**Figure S7: Incidence rate of COVID-19 per 10k inhabitants in mainland Portugal**

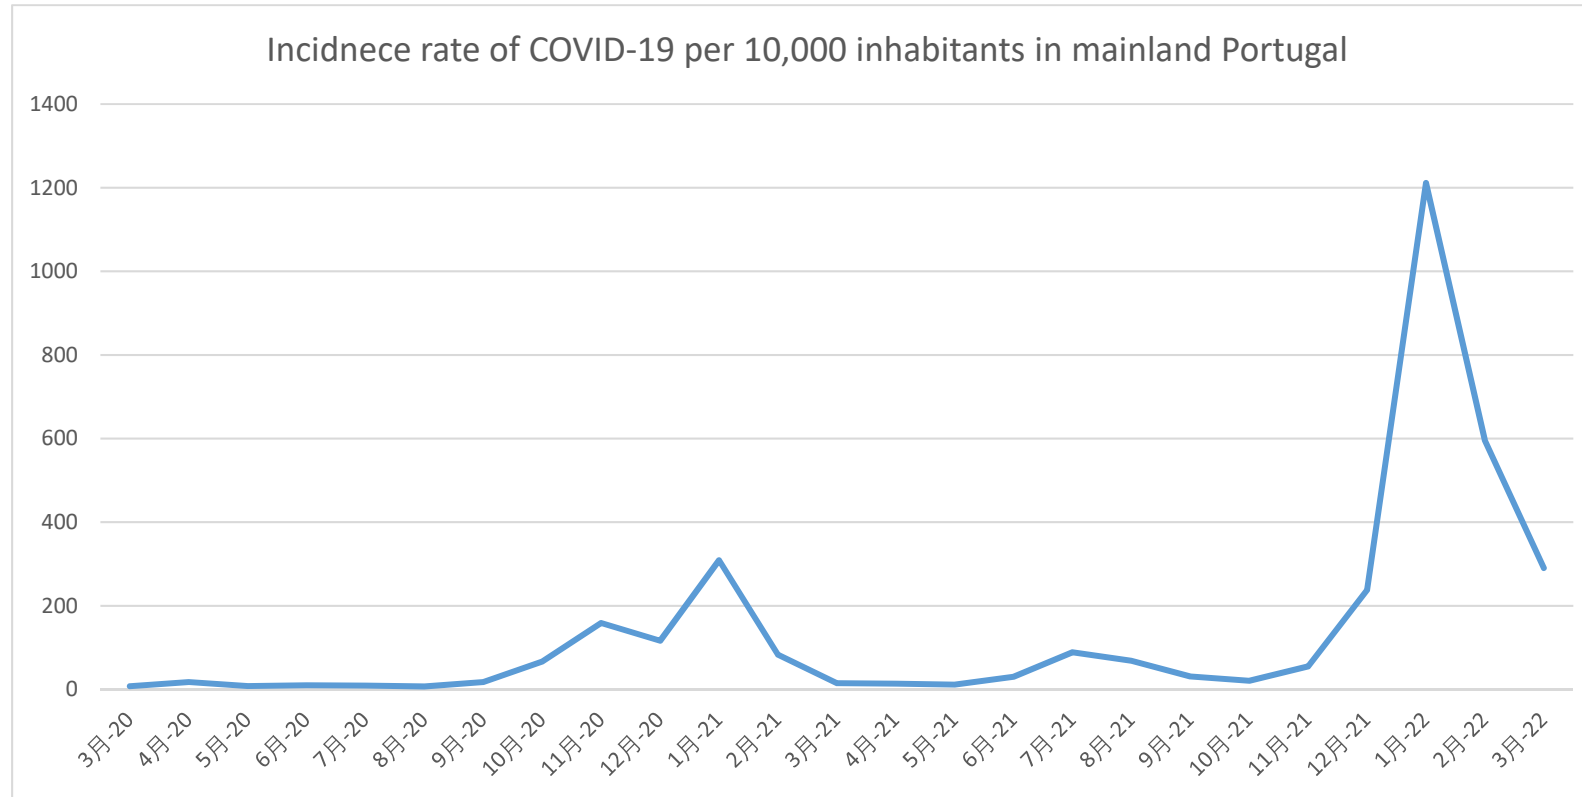

Figure S8: Incidence rate of COVID-19 per 10k inhabitants in the North

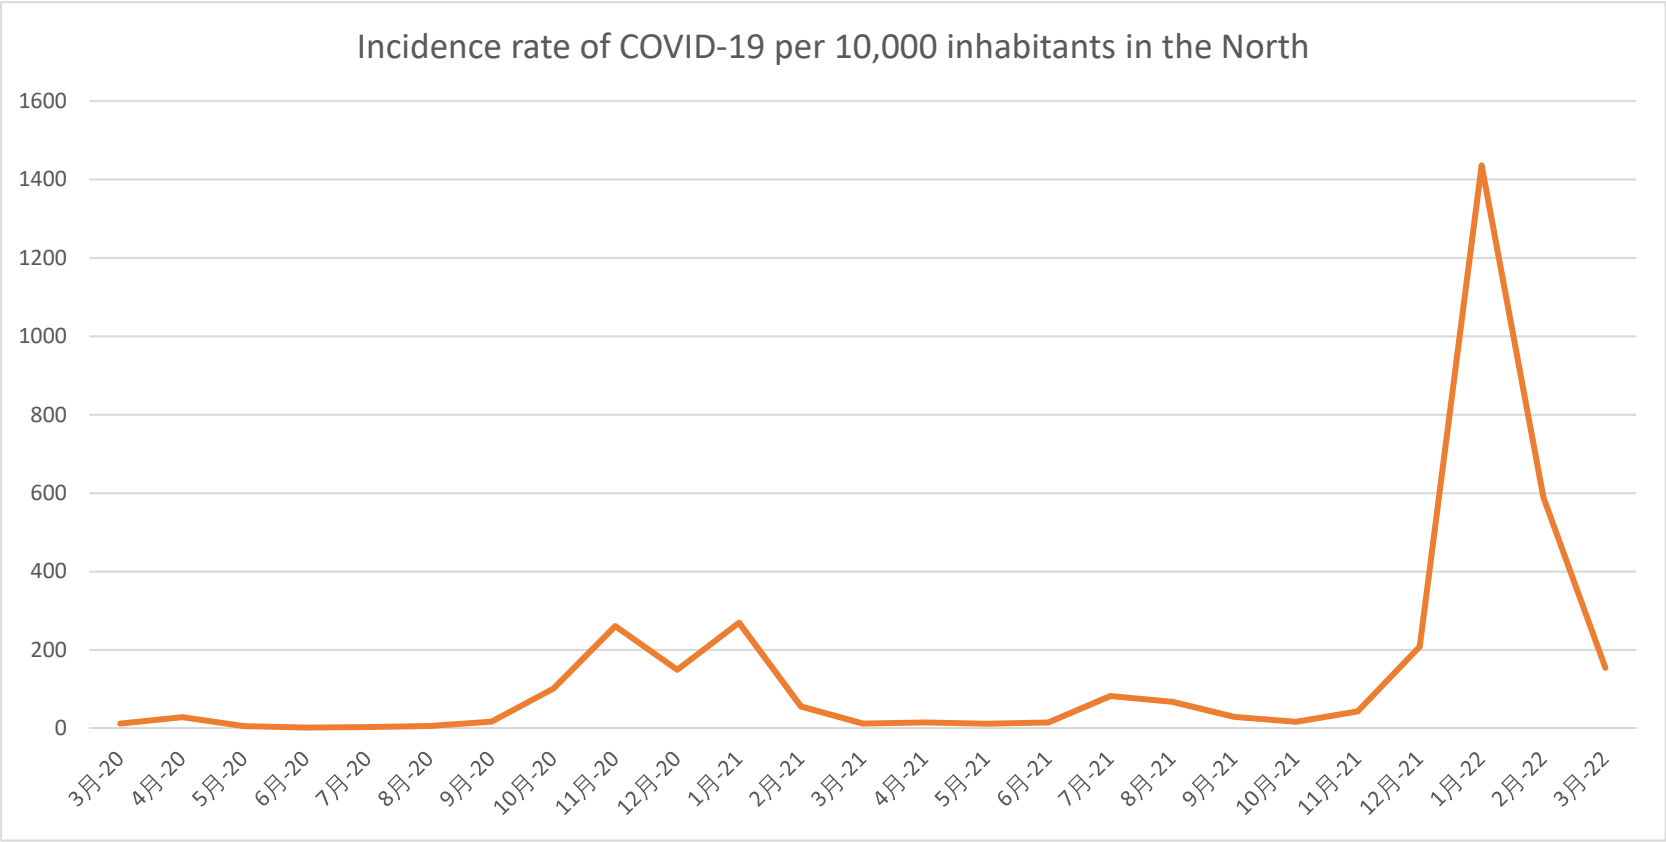

Figure S9: Incidence rate of COVID-19 per 10k inhabitants in the Centre

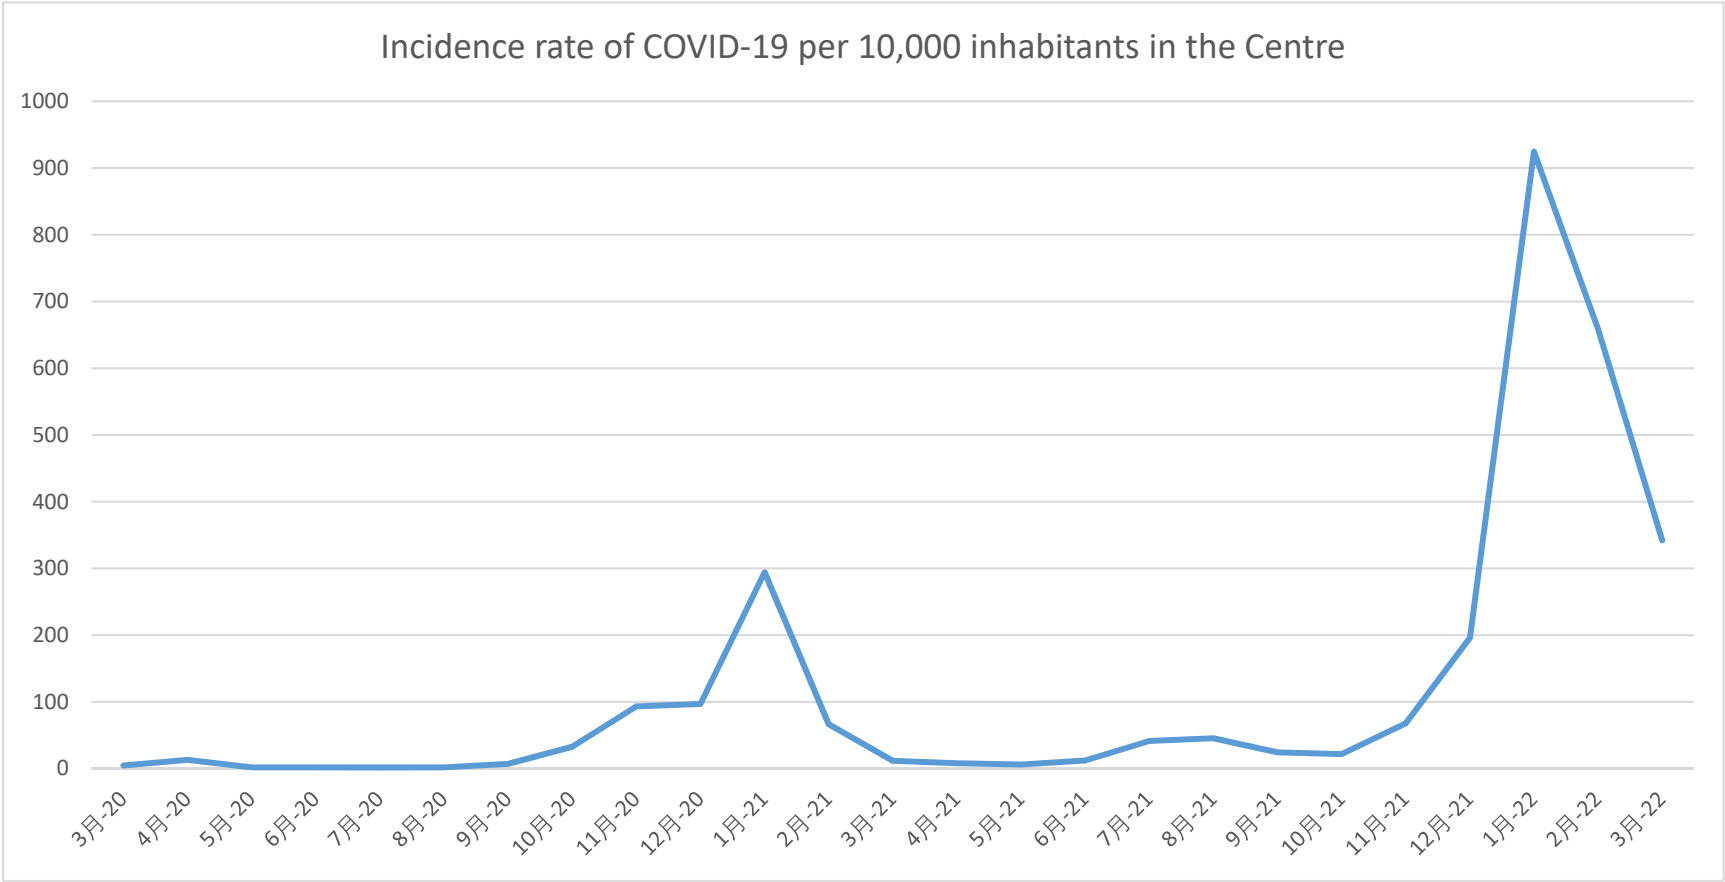

Figure S10: Incidence rate of COVID-19 per 10k inhabitants in LVT

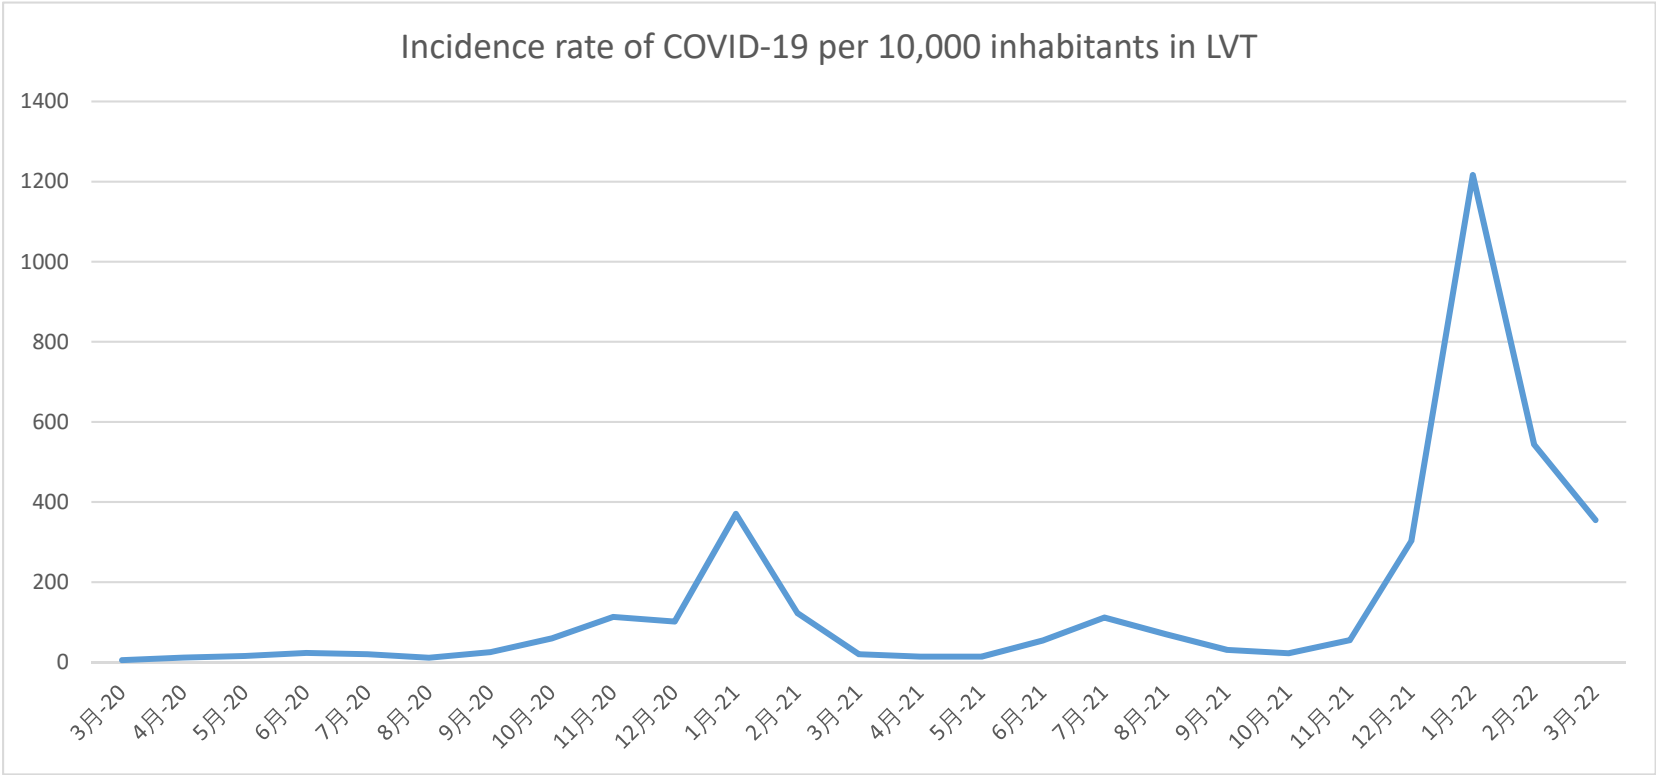

Figure S11: Incidence rate of COVID-19 per 10k inhabitants in Algarve

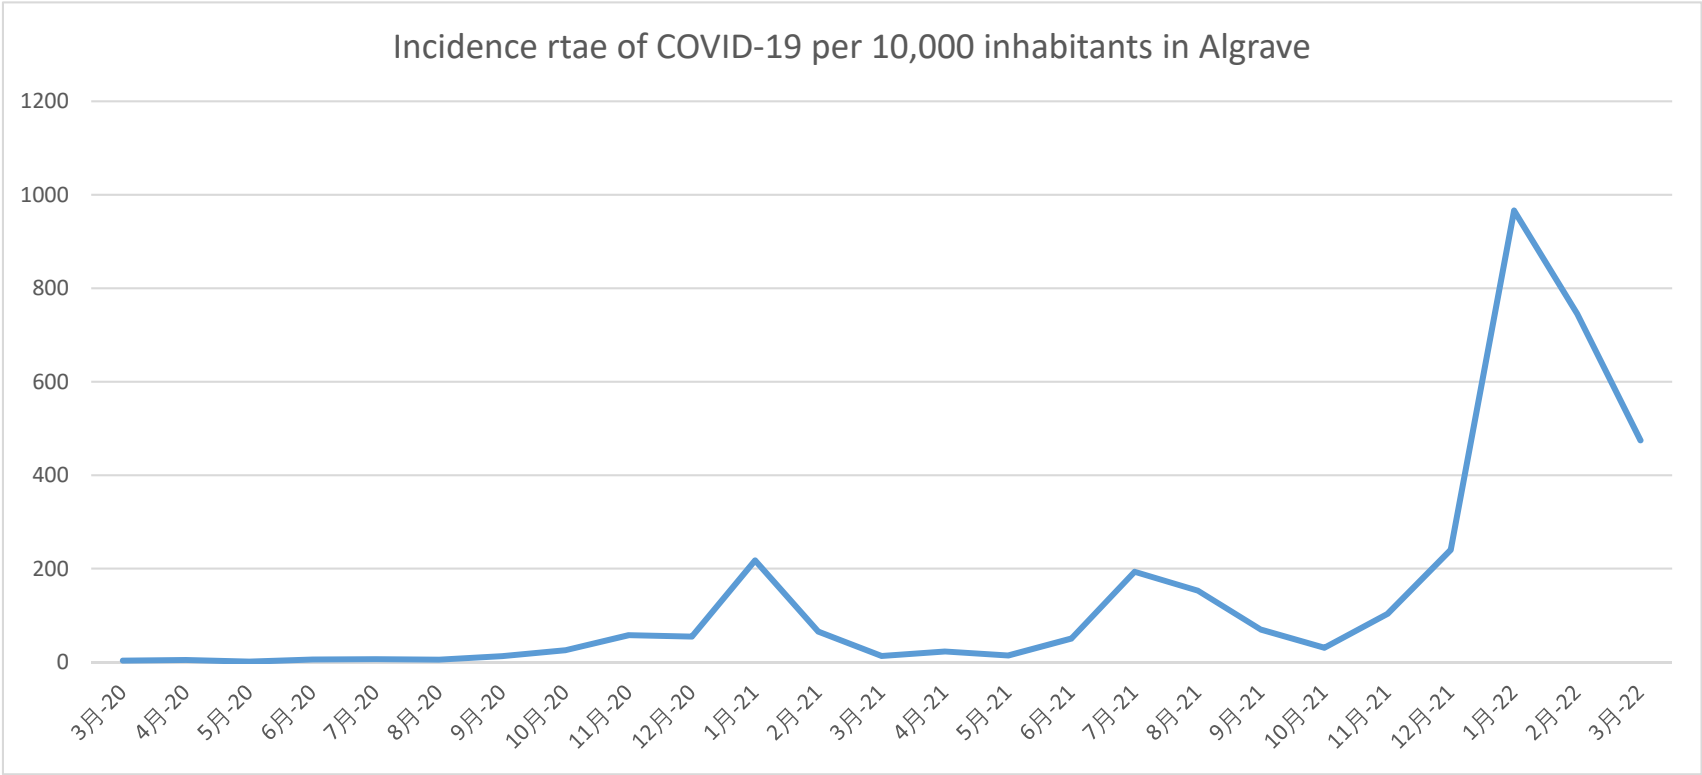

Figure S12: Incidence rate of COVID-19 per 10k inhabitants in Alentejo

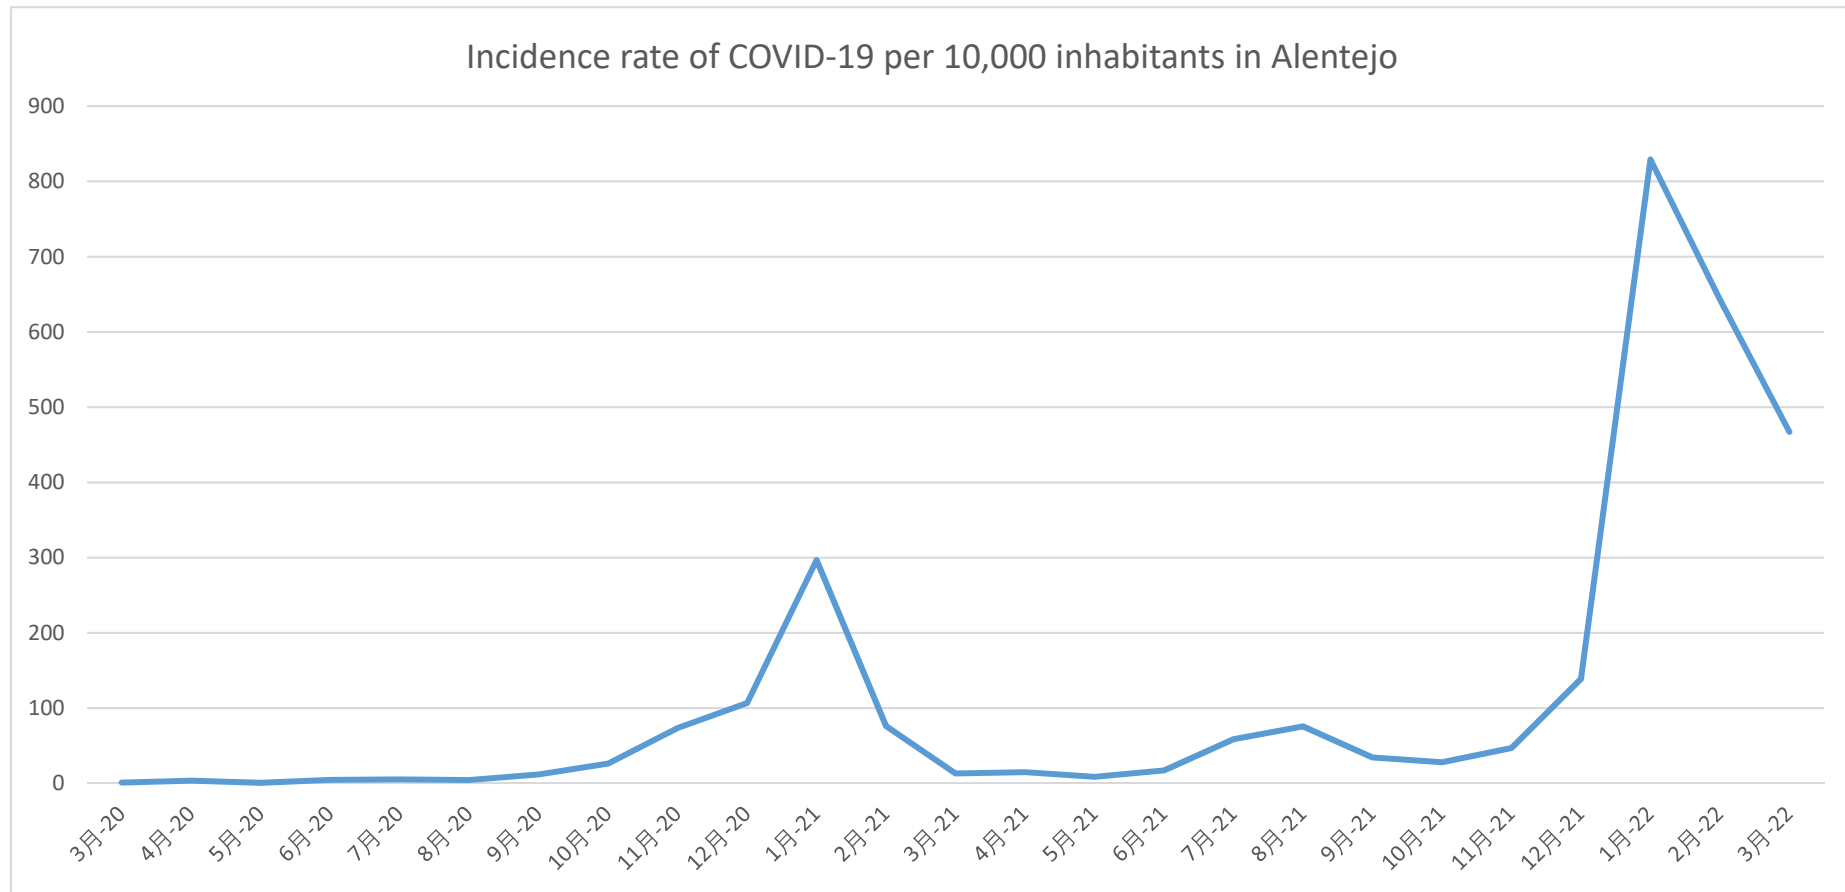

**Figure S13: Vaccination coverage in mainland Portugal**

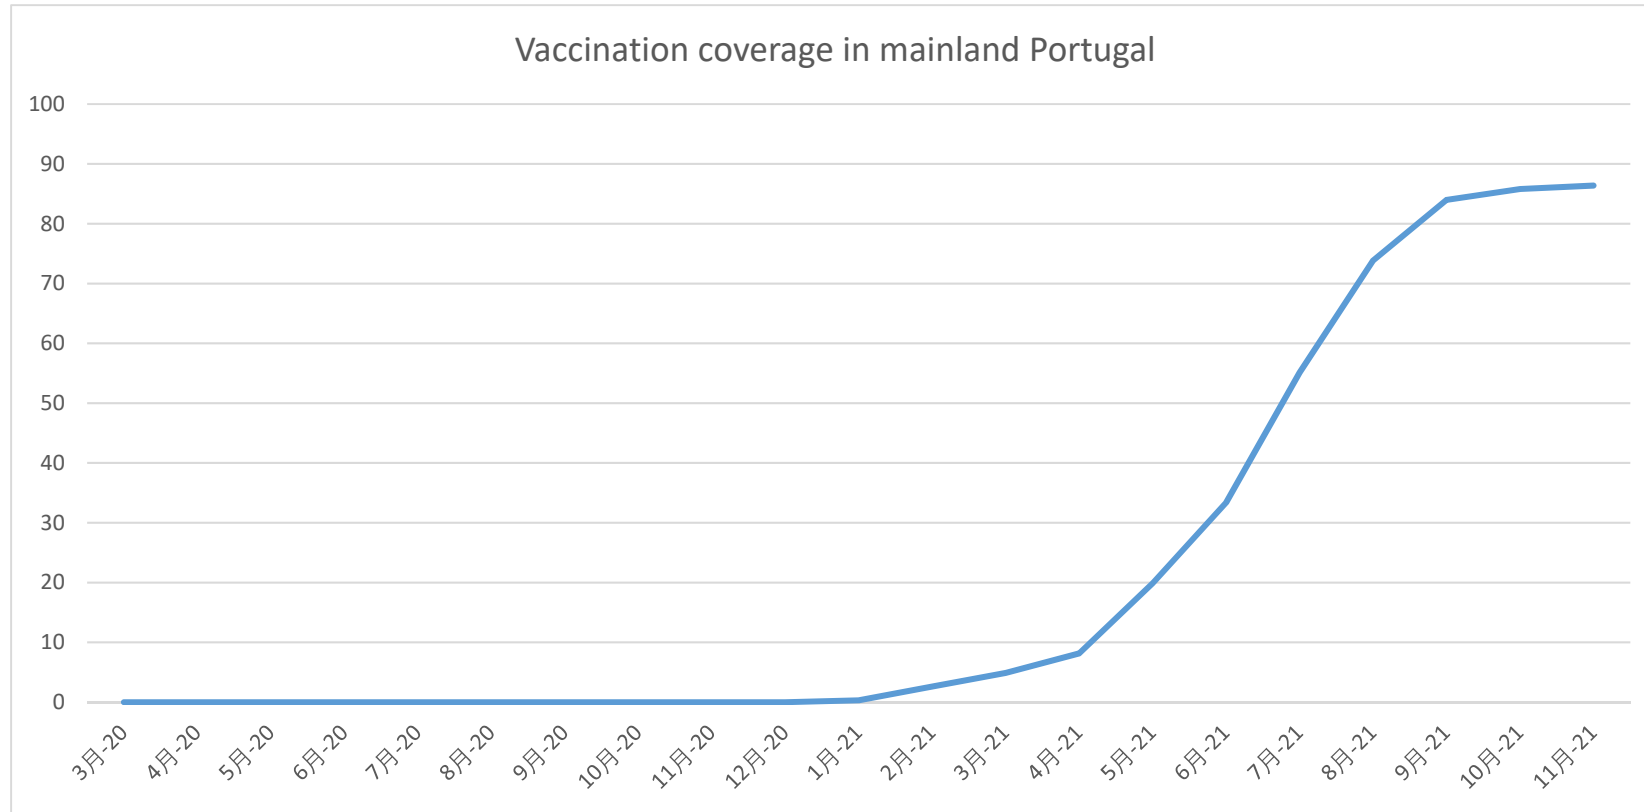

**Figure S14: Vaccination coverage in the North**

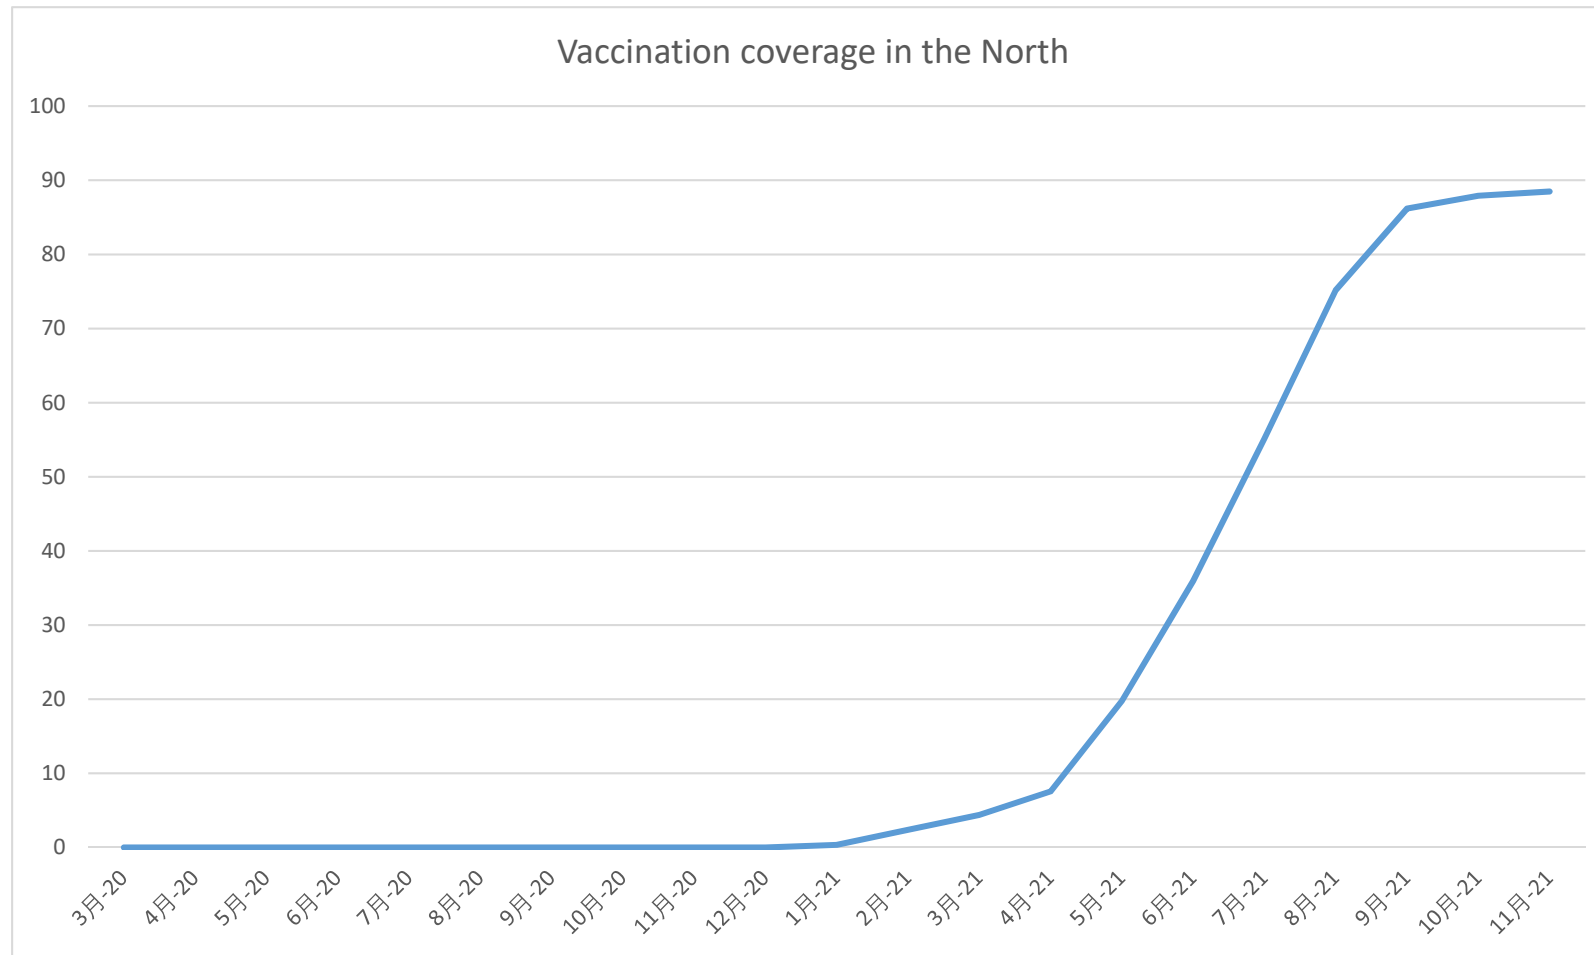



Figure S15: Vaccinatin coverage in the Centre

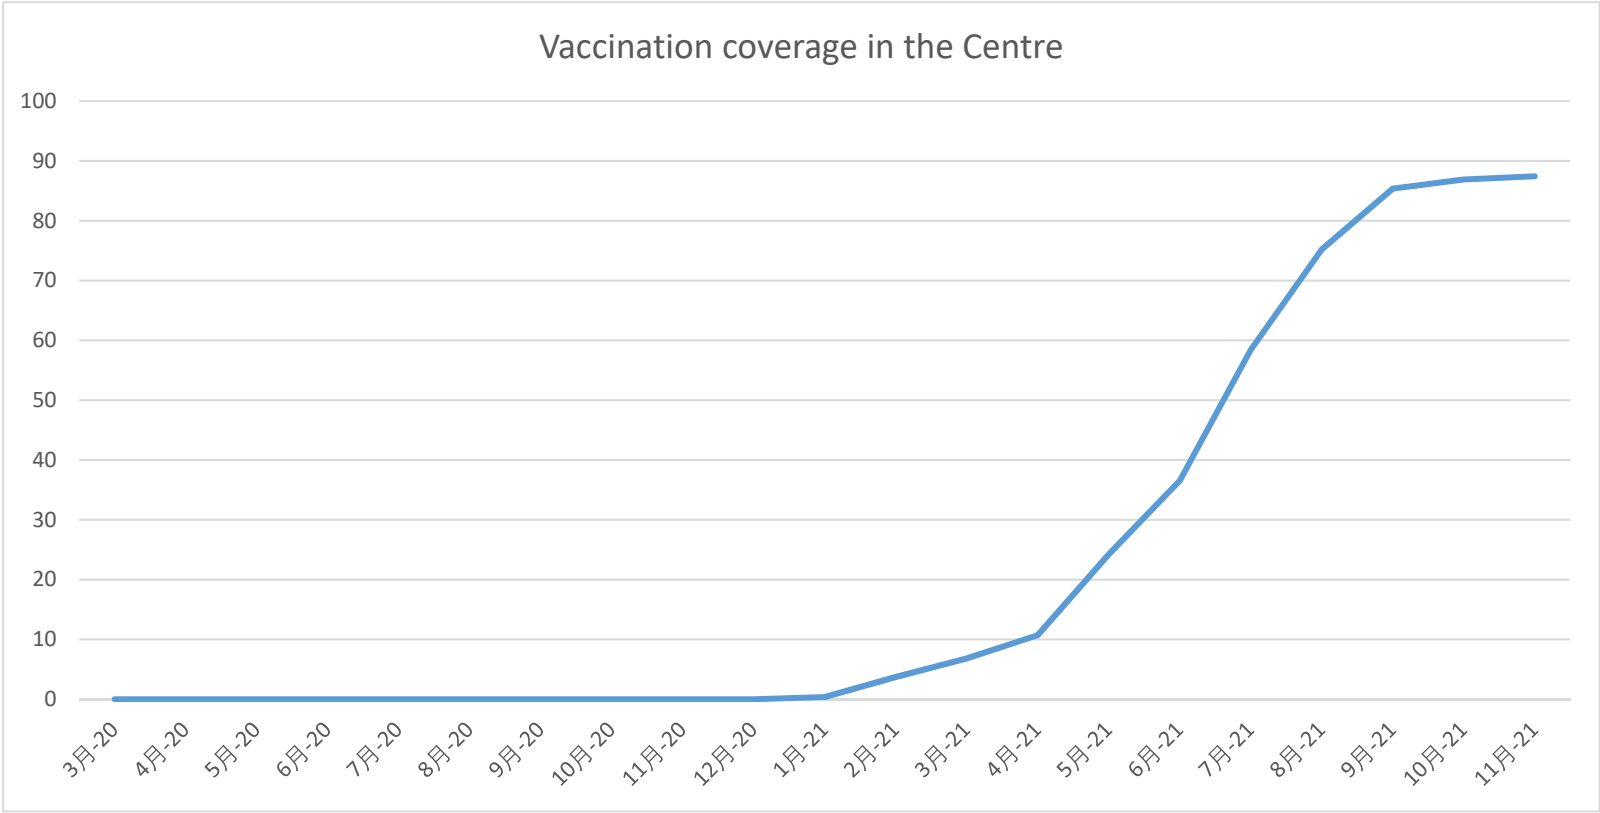

Figure S16: Vaccination coverage in LVT

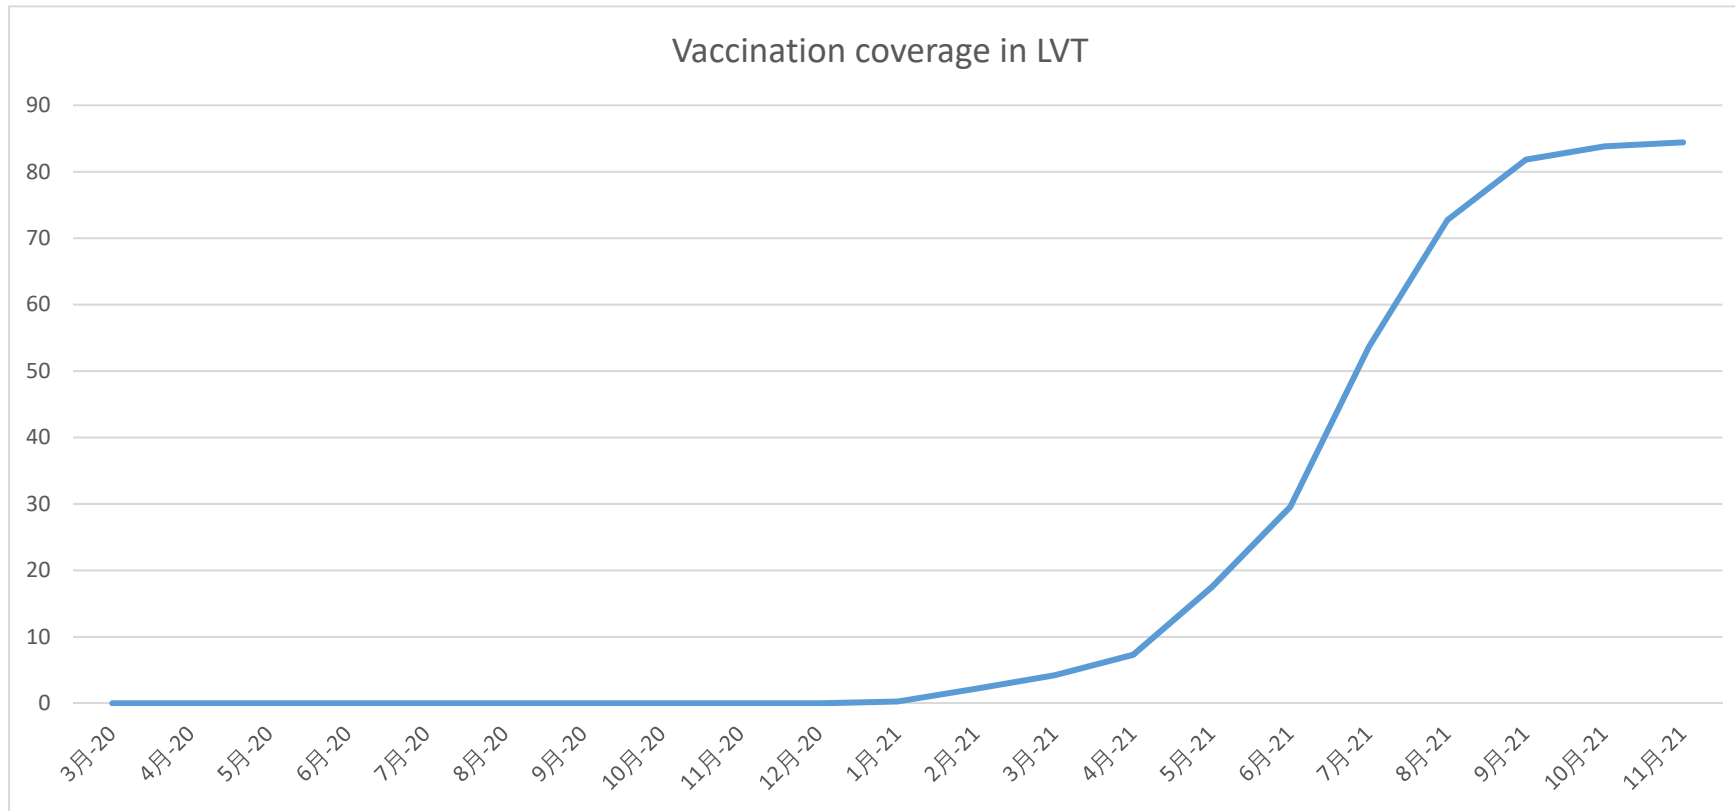

Figure S17: Vaccination coverage in Algarve

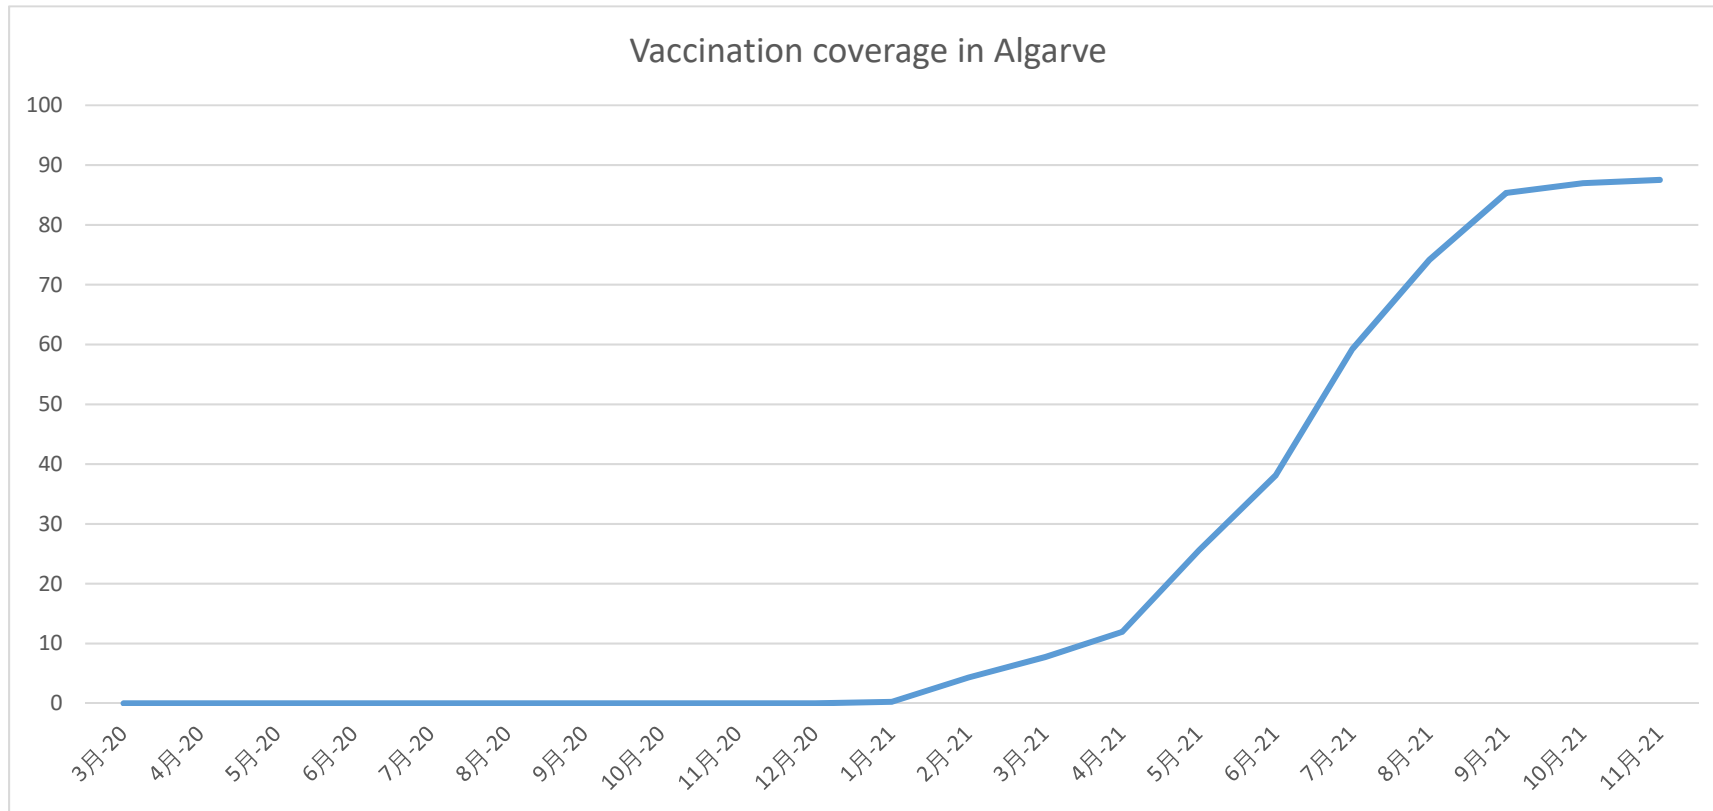

Figure S18: Vaccination coverage in Alentejo

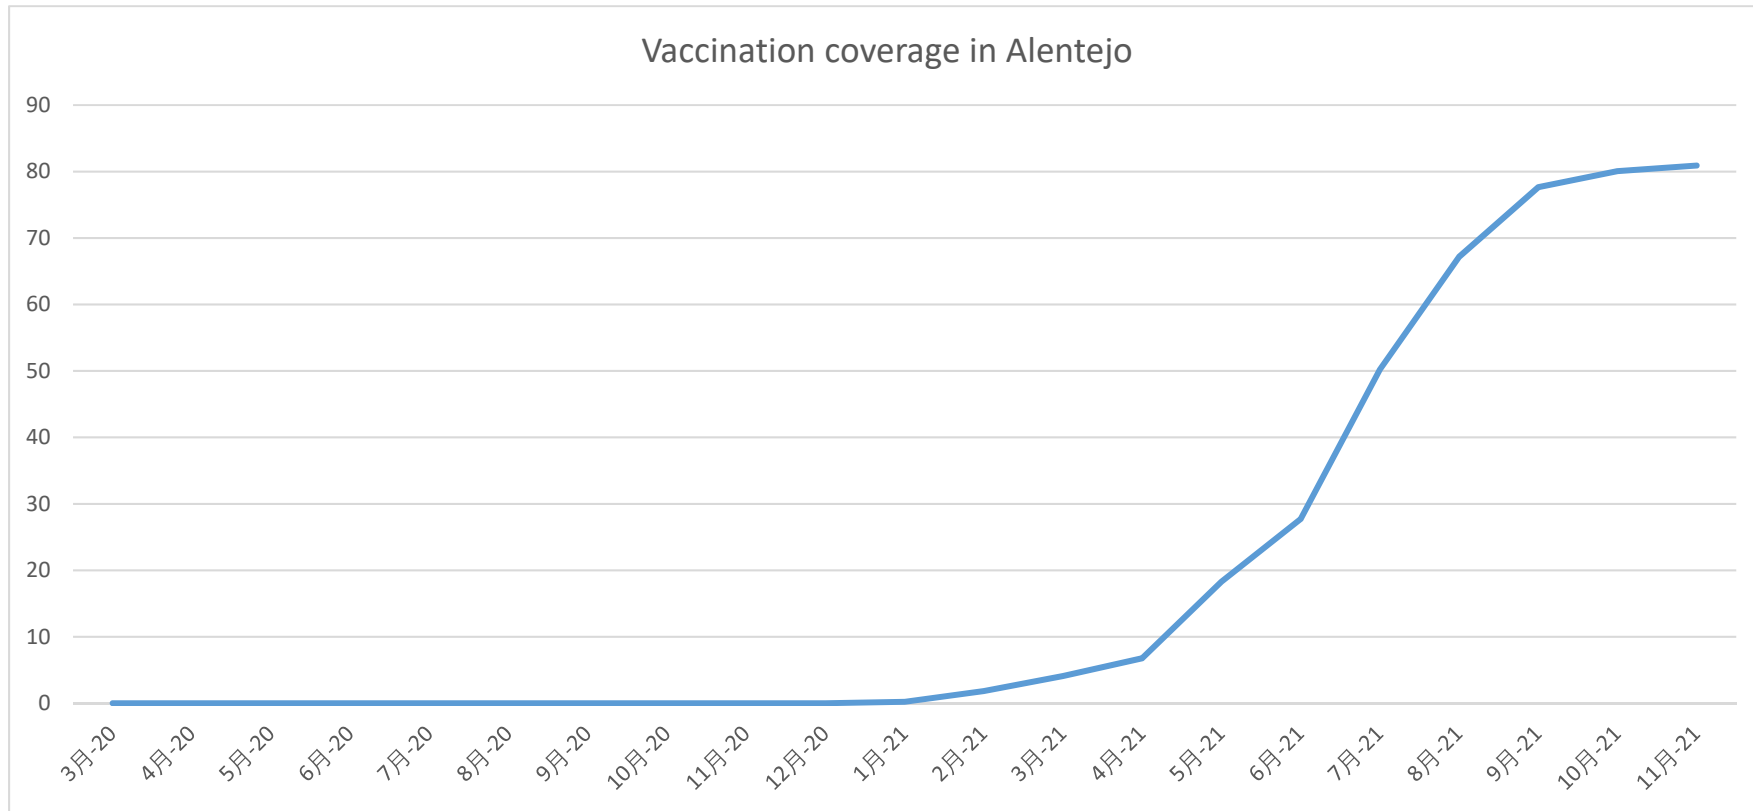

Figure S19: Containment index in Portugal

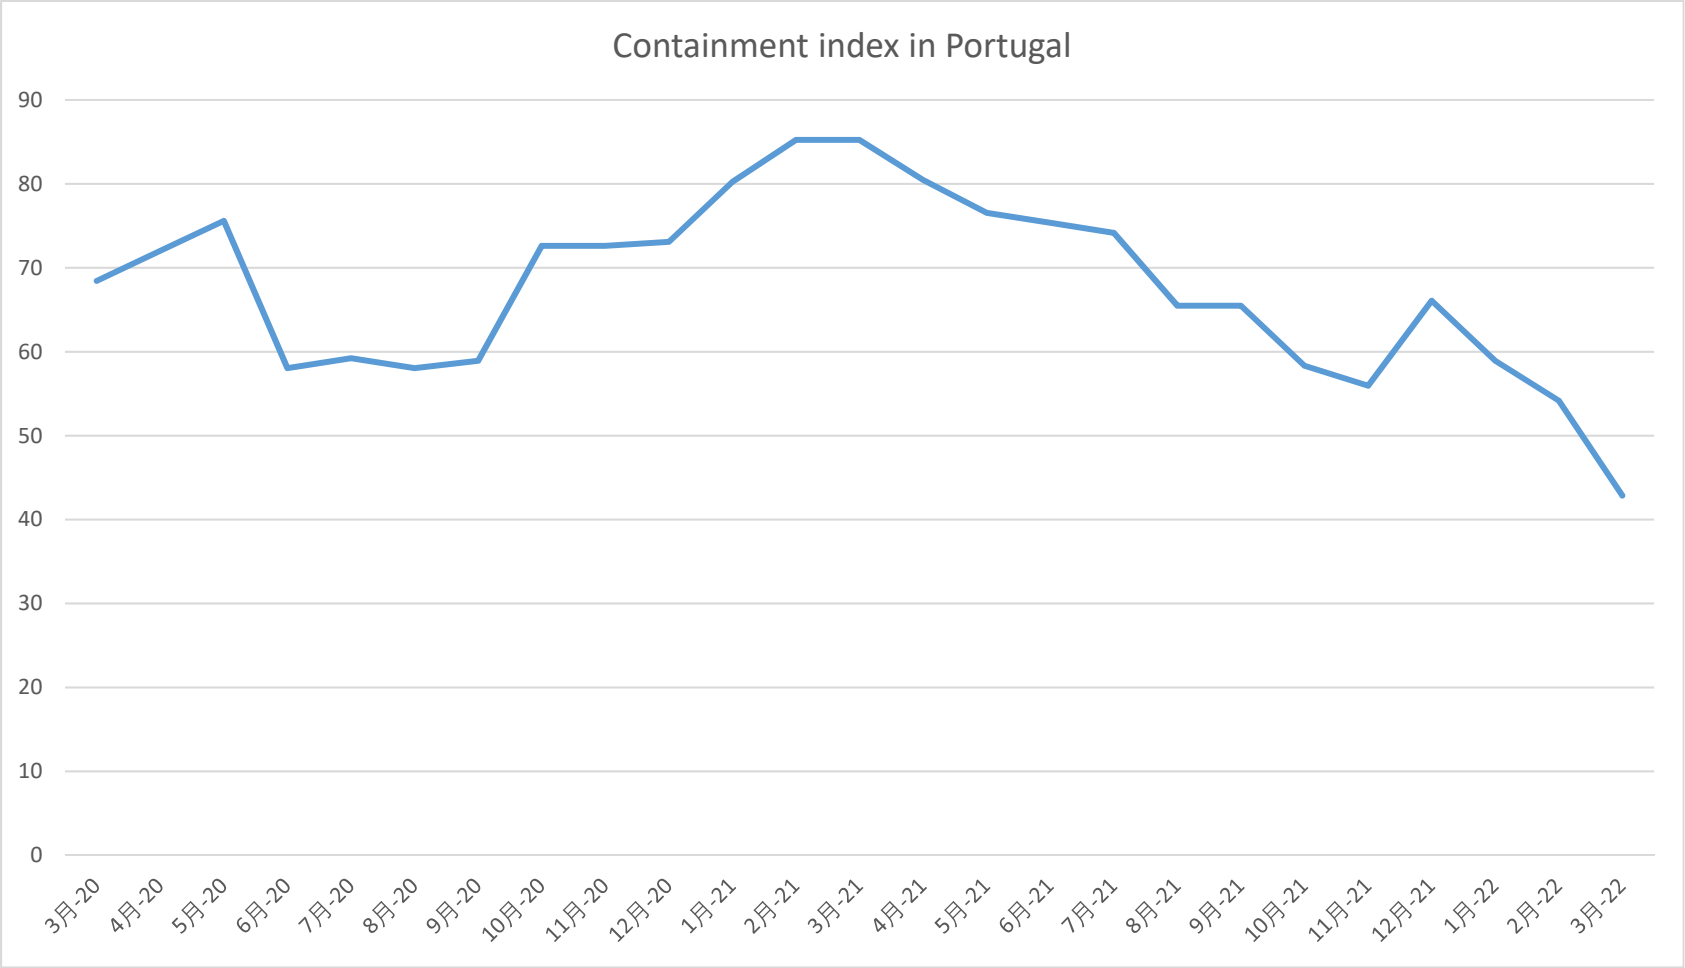

Figure S20: Google search on the term coronavirus in Portugal

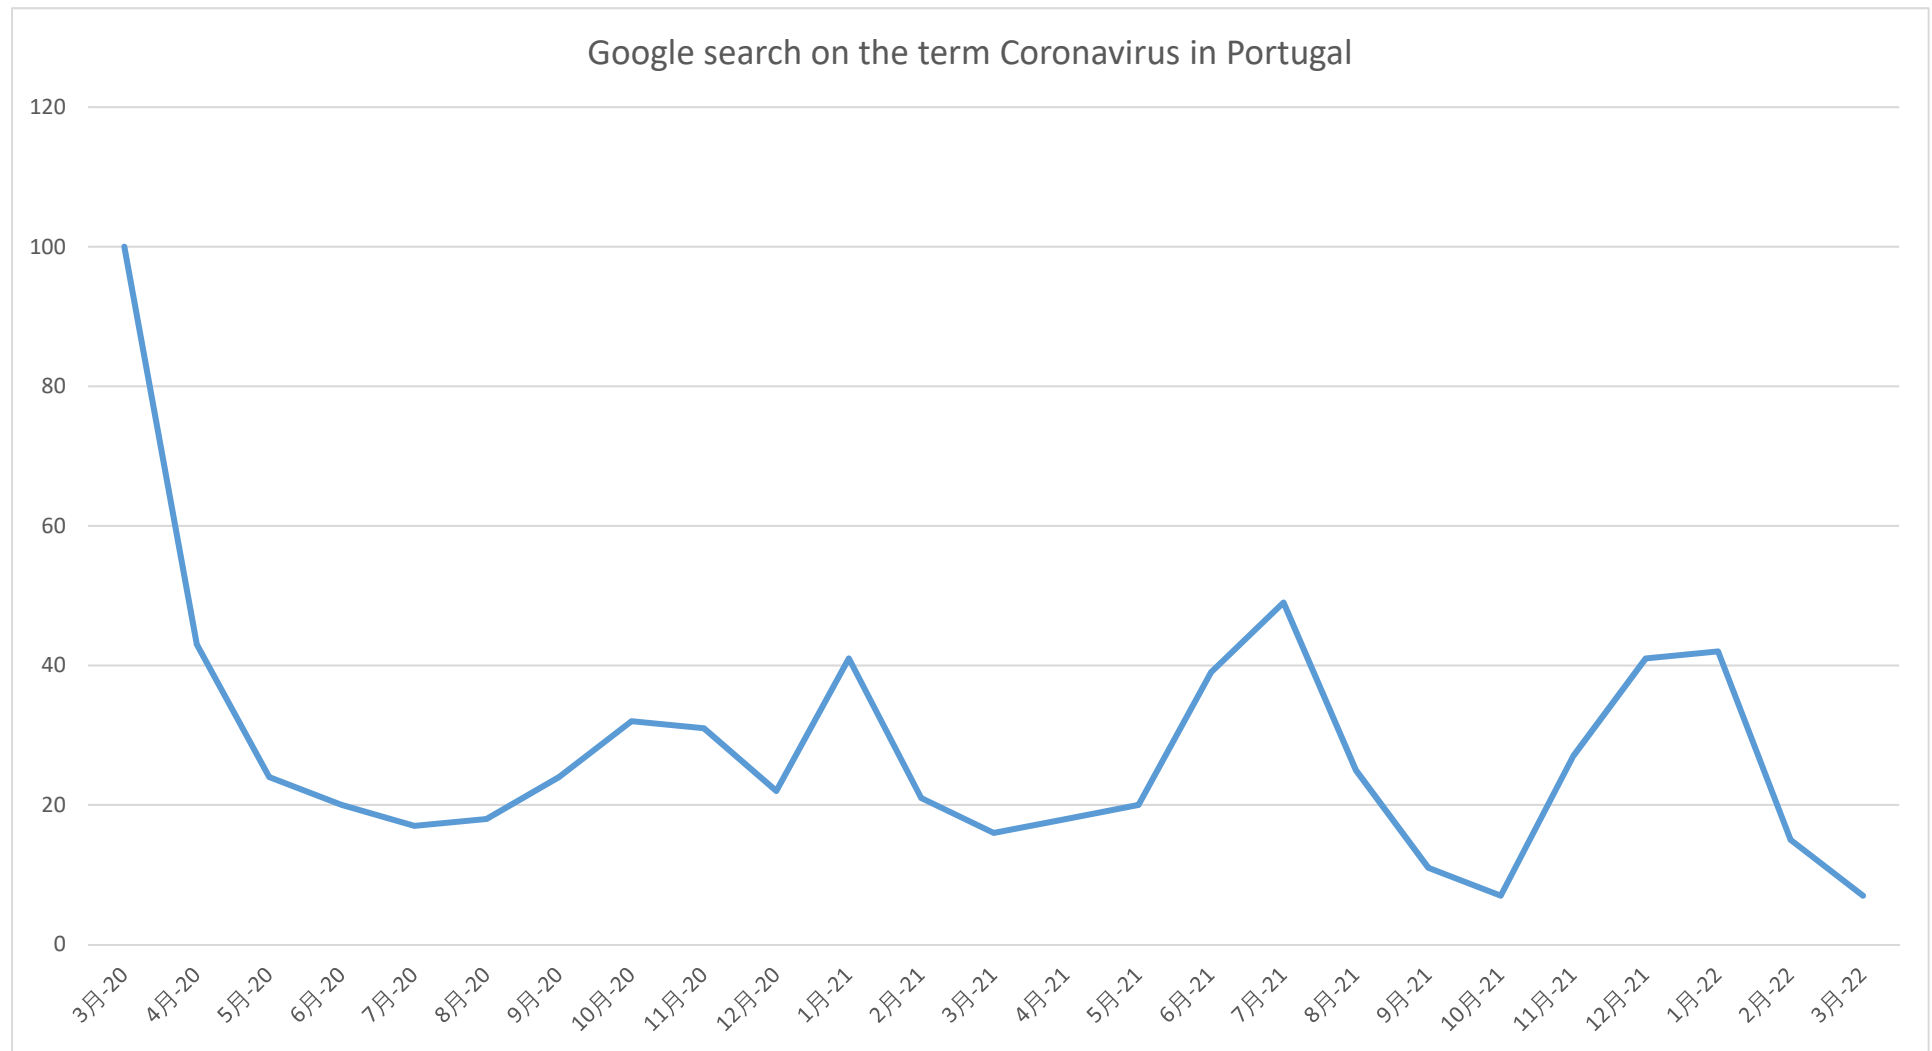

Figure S21: Mobility in Portugal

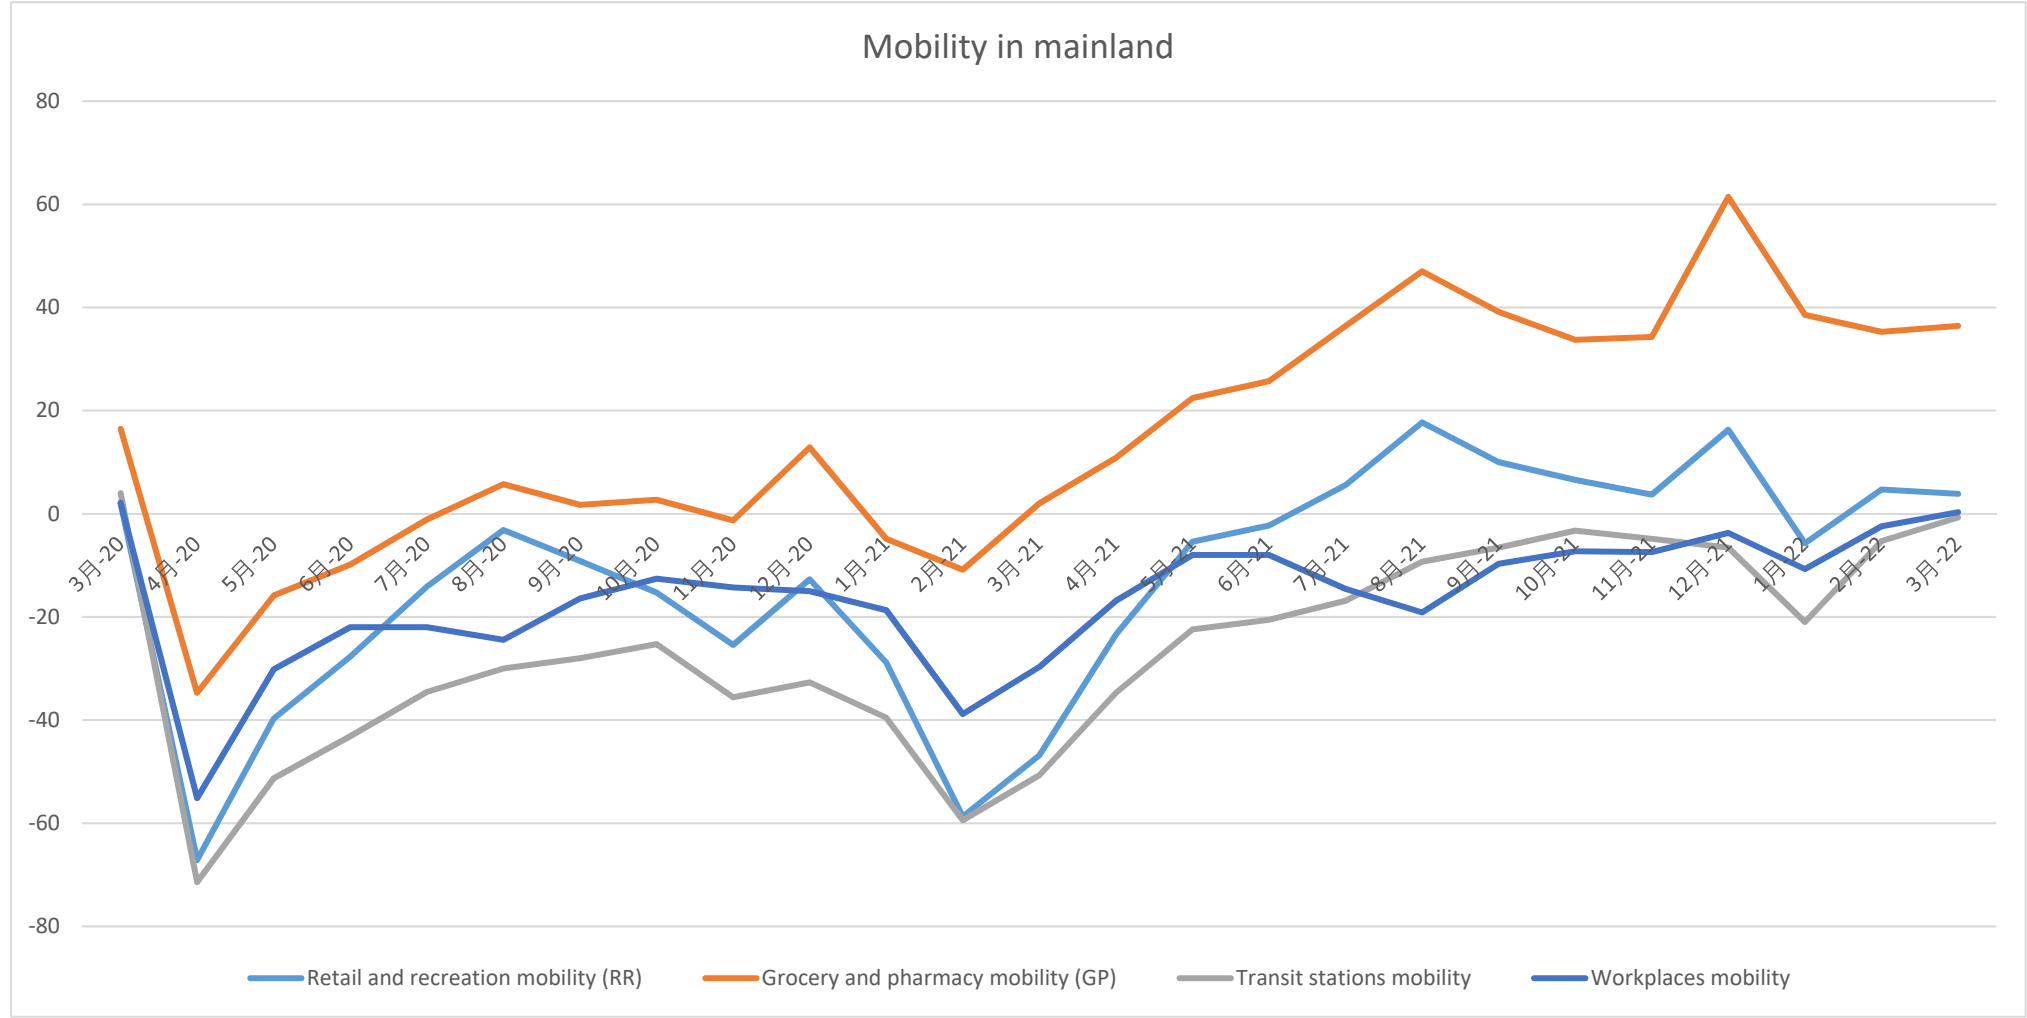

Supplement: s1 [file s1]
